# Supplementary material for: Robust intestinal homeostasis relies on cellular plasticity in enteroblasts mediated by miR-8–Escargot switch
Source: PubMed Central journal article supplement — EMBO J. 2015 Jun 15;34(15):2025–41. doi: 10.15252/embj.201591517 (PMC4551350; doi:10.15252/embj.201591517), 2015-06-15
Supplement: embj0034-2025-sd9.pdf [file embj0034-2025-sd9.pdf]

Manuscript EMBO-2015-91517

## **Robust intestinal homeostasis relies on plasticity in enteroblasts mediated by miR-8-Escargot switch**

Zeus A. Antonello, Tobias Reiff, Esther Ballesta-Illan and Maria Dominguez

*Corresponding author: Maria Dominguez, Instituto de Neurociencias, CSIC-UMH*

---

### **Review timeline:**

Submission date:

13 March 2015

Accepted:

06 May 2015

---

*Editors: Thomas Schwarz-Romond and David del Álamo*

Note: This manuscript was transferred from a different journal and The EMBO Journal editorial team had access to both the original anonymous comments as well as the point-by-point response provided by the authors. As the referees originally reviewed this manuscript for another publication they could not accept our transparent policy agreement and therefore their comments must remain confidential.
